# Supplementary material for: Adipose-on-a-chip: a dynamic microphysiological in vitro model of the human adipose for immune-metabolic analysis in type II diabetes
Source: Royal Society of Chemistry journal article supplement (doi:10.1039/c8lc00481a), 2018-12-12
Supplement: c8lc00481a1.pdf [file c8lc00481a1.pdf]

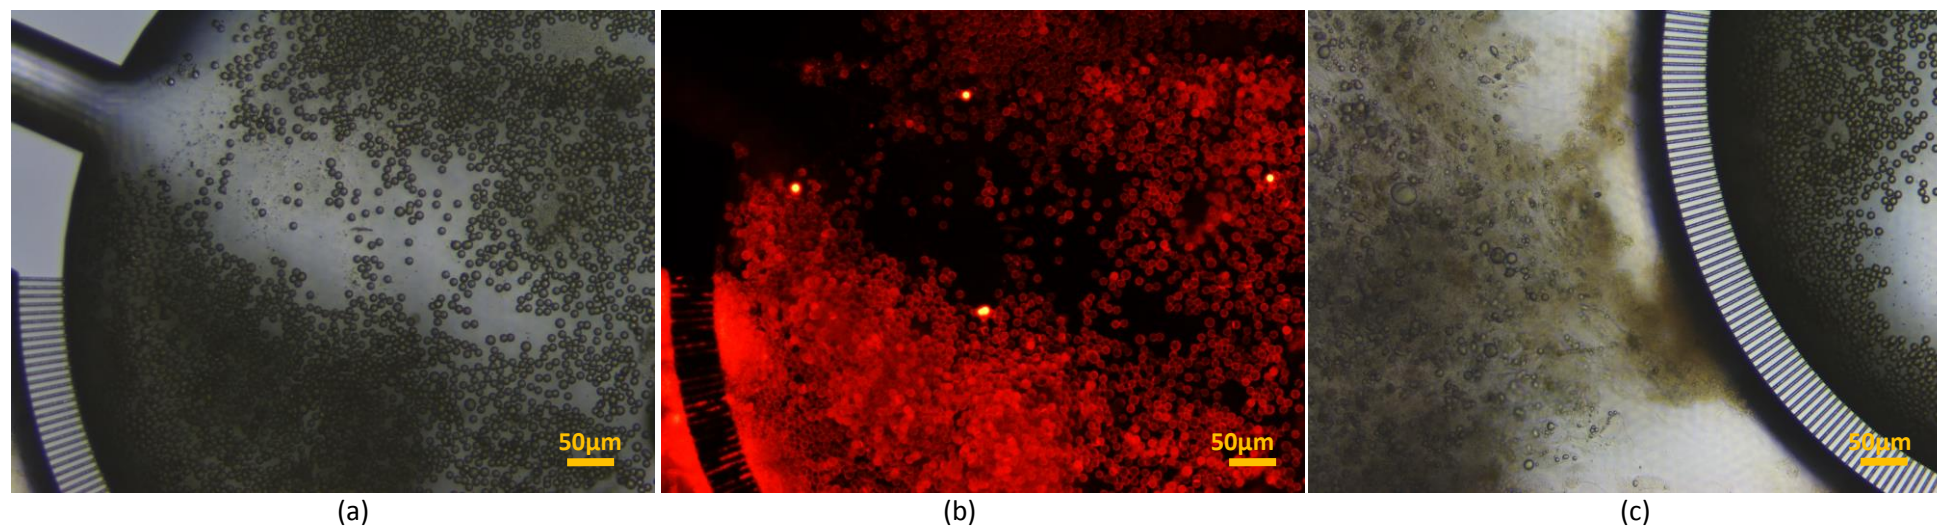

**Figure S1.** Bright-field (a) and fluorescent (b) images of magnetic beads loaded in compartment C. (c) Optical image shows adipocytes in compartment B and magnetic beads in compartment C.

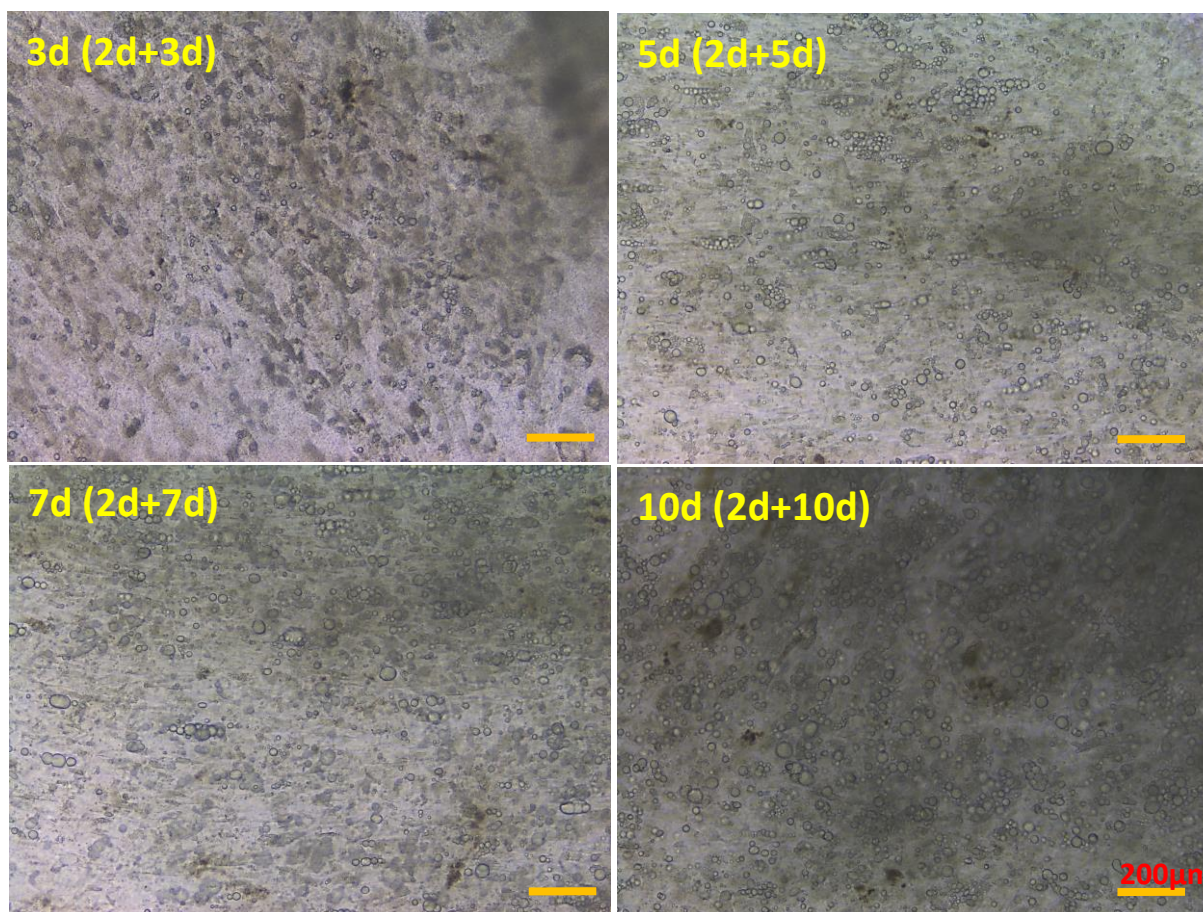

(a)

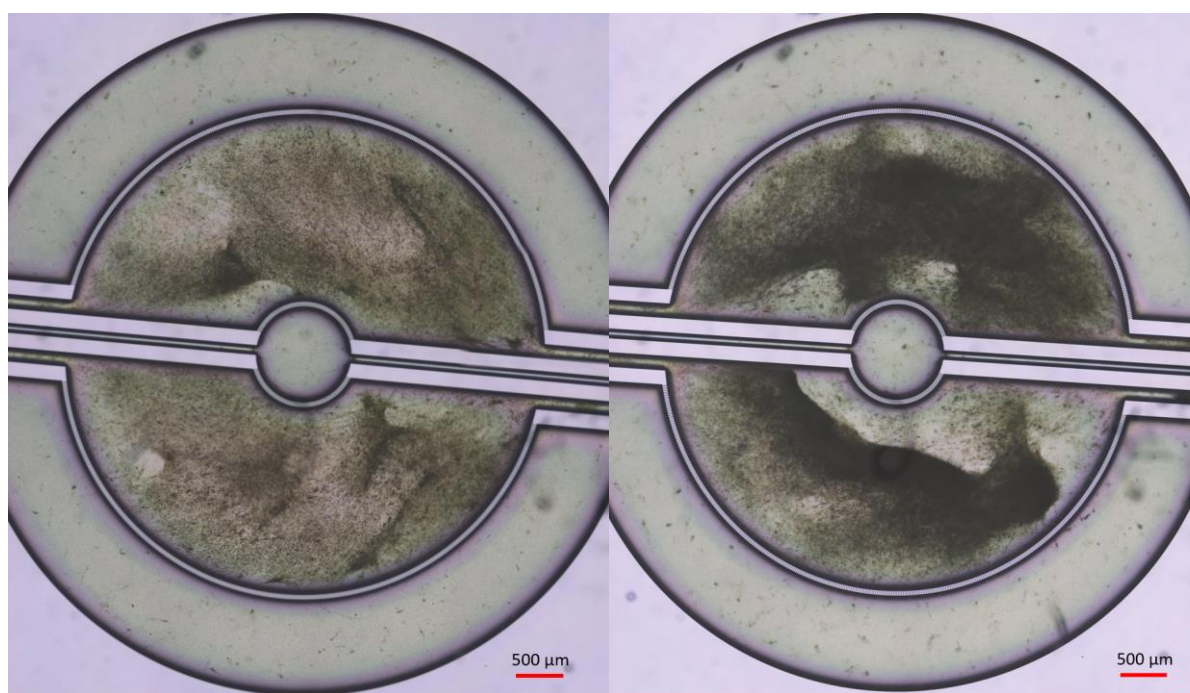

(b)

(c)



**Figure S2.** (a) Optical images of adipocytes cultured in differentiation medium at different time intervals (days in growth medium+ days in differentiation medium). (b) An overview image of the chip with adipocytes differentiated for 3 days (total culture of 5 days). (c) An overview image of the chip with adipocytes differentiated for 10 days (total culture of 12 days).

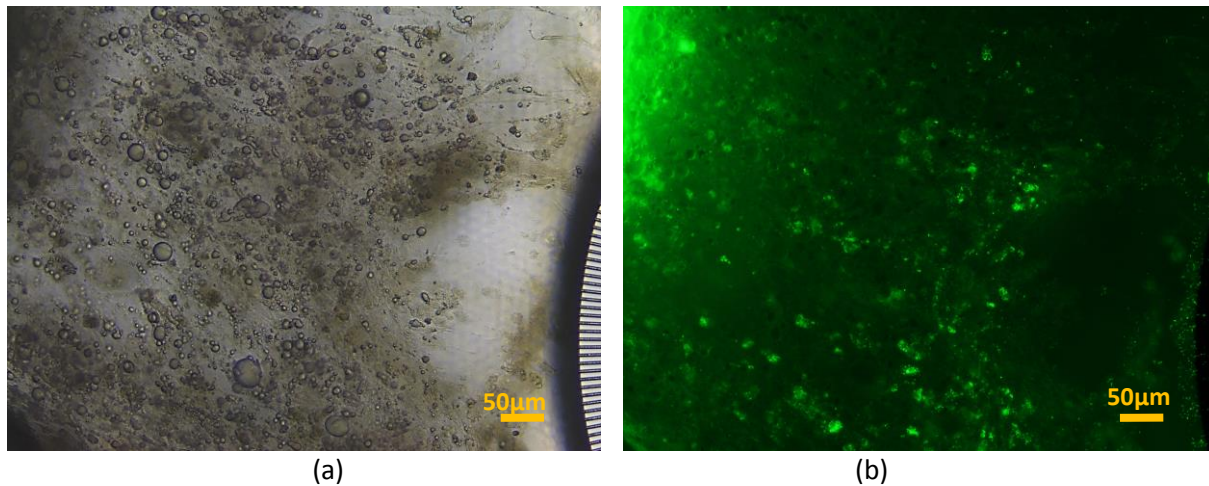

**Figure S3:** (a) Bright-field images of adipocytes cultured on chip for 34 days. (b) Fluorescent images of adipocytes stained with Calcein-AM. Live cells were shown in green color.

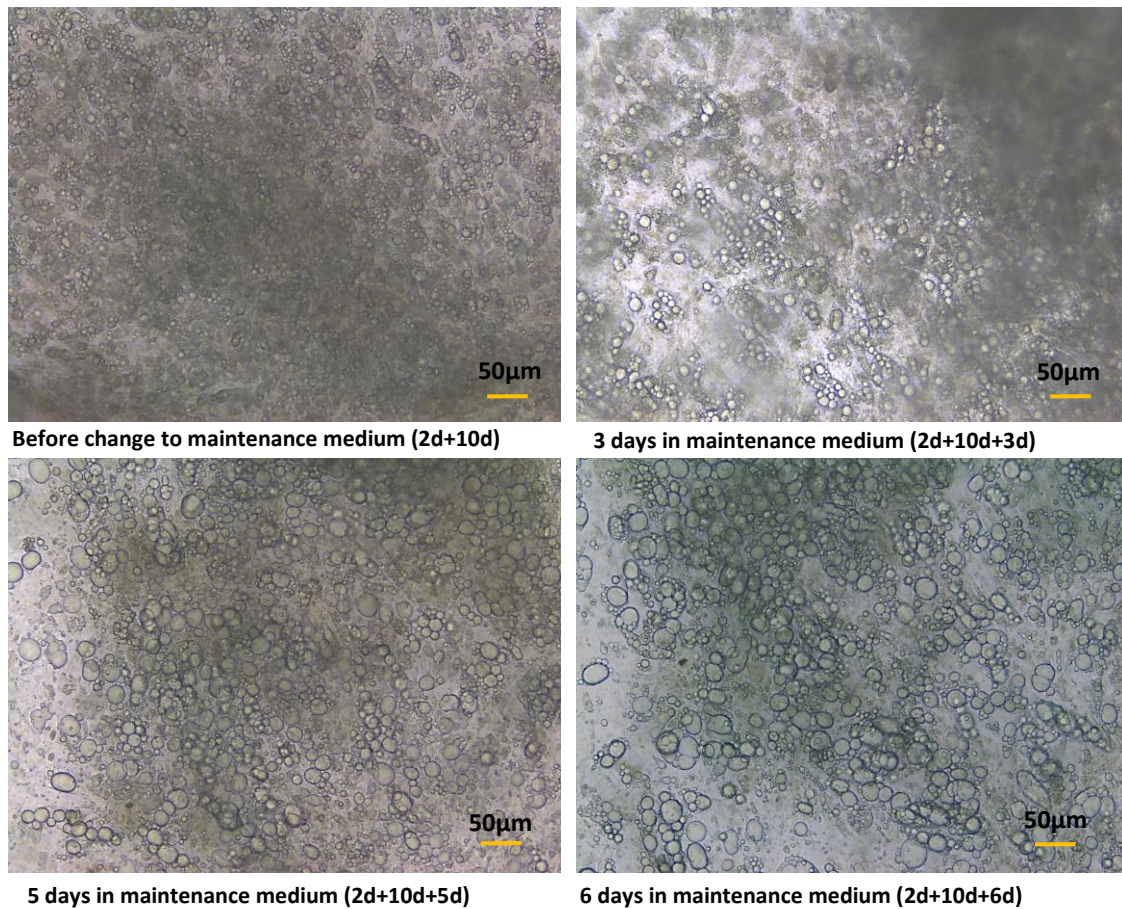

**Figure S4:** Adipocytes cultured in maintenance medium.

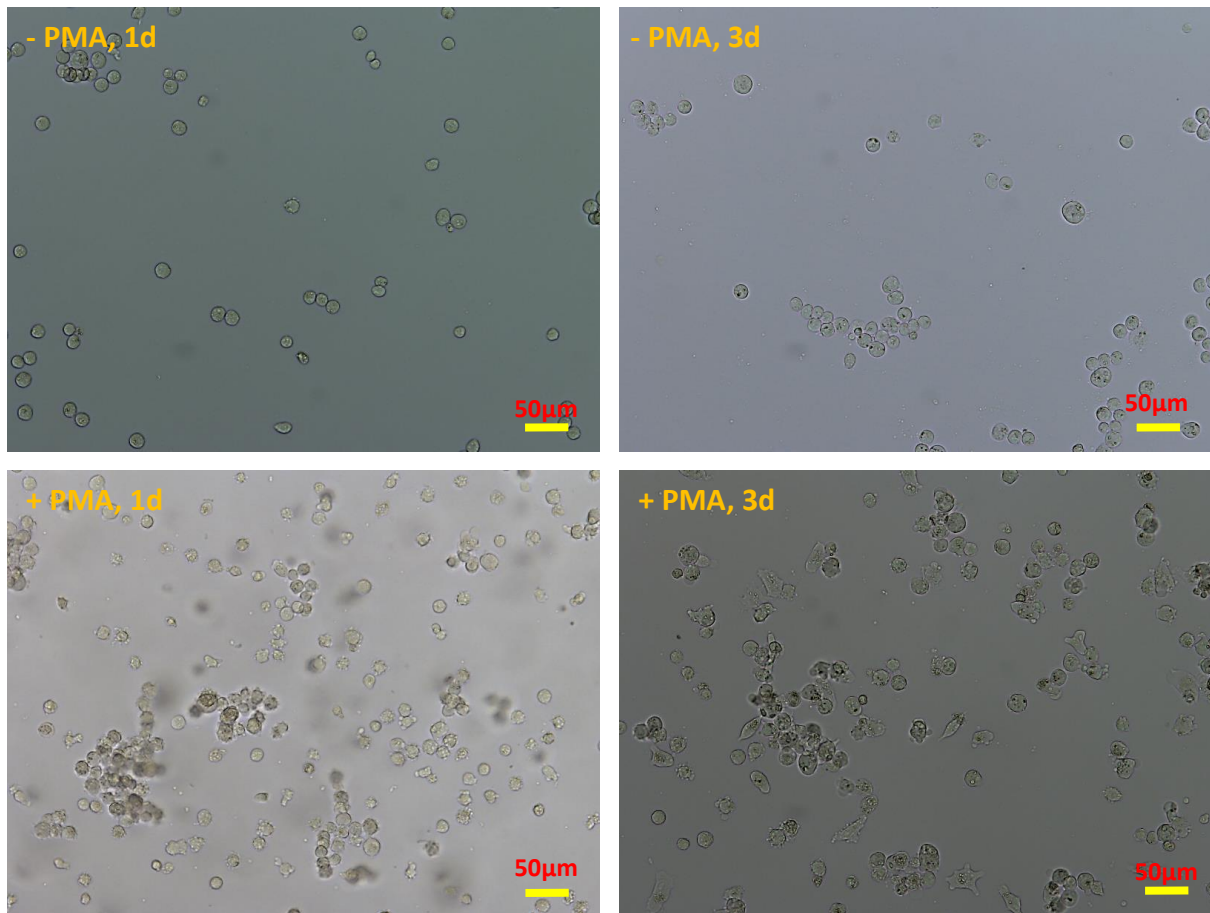

**Figure S5:** Microscopic pictures of untreated U937 cells (- PMA) and PMA-treated U937 cells (+ PMA) cultured on petri dish. To differentiate U937 cells into macrophage-like cells, cells were exposed to 100ng/ml PMA for 24 hours, and then centrifuged and resuspended in fresh DMEM medium without PMA. Cells were kept on petri dish for an other 2 days, and then fixed with 4% PFA.
